# Supplementary material for: Notch2 controls non-autonomous Wnt-signalling in chronic lymphocytic leukaemia
Source: PubMed Central journal article supplement (PMC6155045; doi:10.1038/s41467-018-06069-5), 2018-09-21
Supplement: 41467_2018_6069_MOESM1_ESM.pdf [file 41467_2018_6069_MOESM1_ESM.pdf]

## **Supplementary Figures and Tables**

**Mangolini, Götte et al.**

*Notch2 controls non-autonomous Wnt-signalling in chronic lymphocytic leukaemia*

a

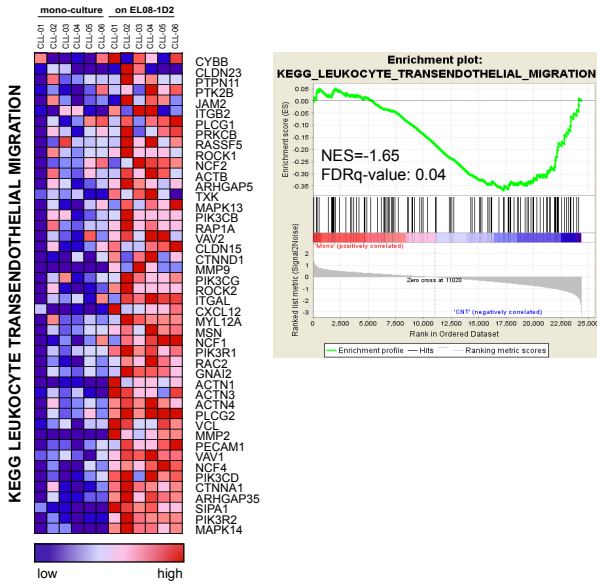

b

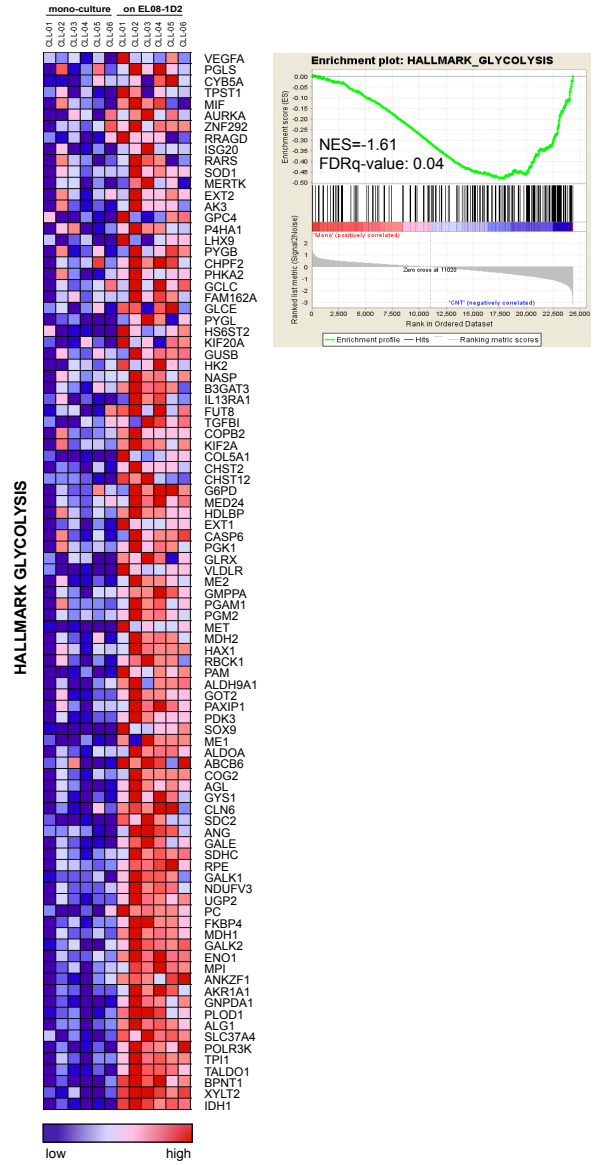

Supplementary Figure 1

a,b: The figure shows the enrichment plot and the heat-maps of gene sets relevant for several core pathways and altered following CLL-MSCs contact according to Gene set enrichment analysis (GSEA). All probe sets interrogating the respective target genes are given.

a

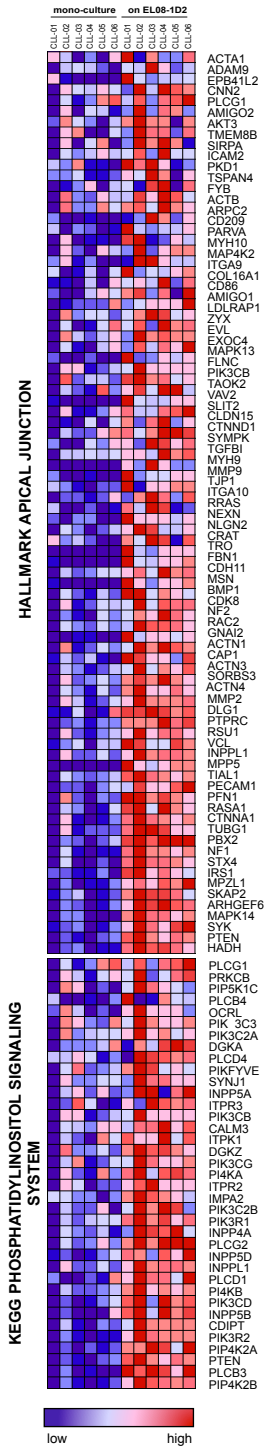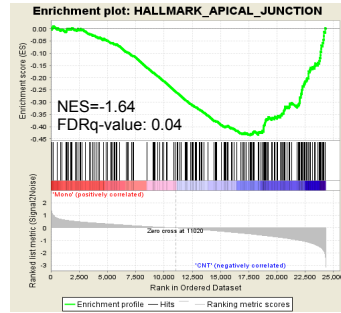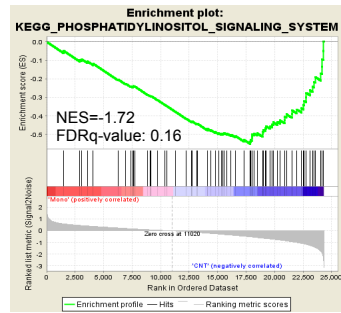

b

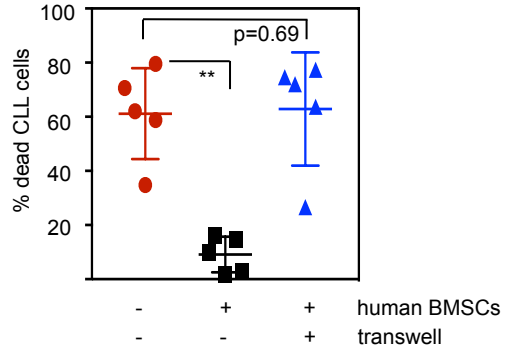

Supplementary Figure 2

- The figure shows the enrichment plot and the heat-maps of gene sets relevant for several core pathways and altered following CLL-MSCs contact according to Gene set enrichment analysis (GSEA). All probe sets interrogating the respective target genes are given.
- CLL cells were cultured in medium only (red circles) or on human BMSCs cells (black squares) for 5 days before analysing apoptotic cells by Annexin-V/DAPI staining. Transwells were used to disrupt direct cell-cell contacts (blue triangles). Error bars show mean  $\pm$  SEM from 5 patients. \*\* $p < 0.01$ .

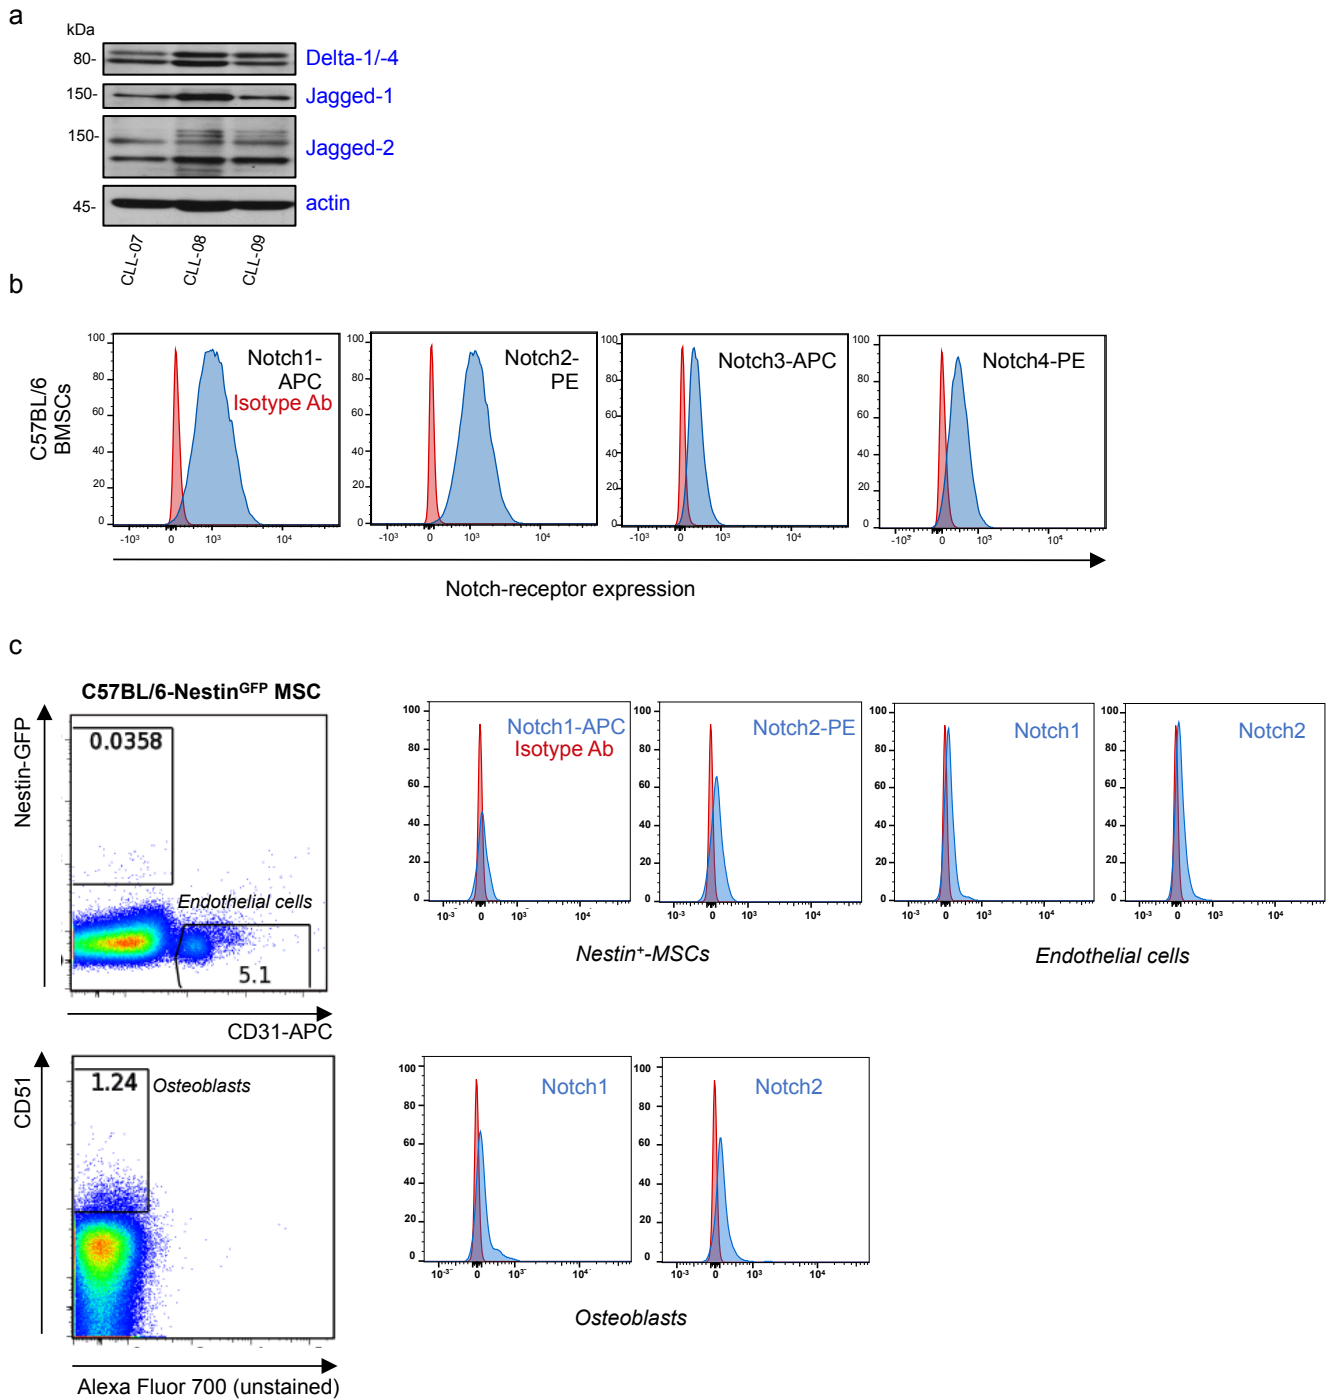

### Supplementary Figure 3

- Constitutive expression of the Notch-ligands Delta-1,-4, Jagged-1 and Jagged-2 were analysed in primary CLL cells obtained from 3 different patients by immunoblotting.
- Expression of Notch1-4 in cultured primary MSCs derived from 8 weeks old C57BL/6 mice, assessed by flow cytometry.
- Expression of Notch1 and Notch2 in primary MSCs derived from the bone marrow of 10-weeks-old C57BL/6 *Nestin<sup>GFP</sup>* mice. Nestin-positive cells were identified by staining for GFP, endothelial cells by staining with CD31, osteoblasts were CD51 positive. Analyses of 3 additional mice revealed similar results. Isotype controls for Notch were used as negative control and performed on the bulk population.

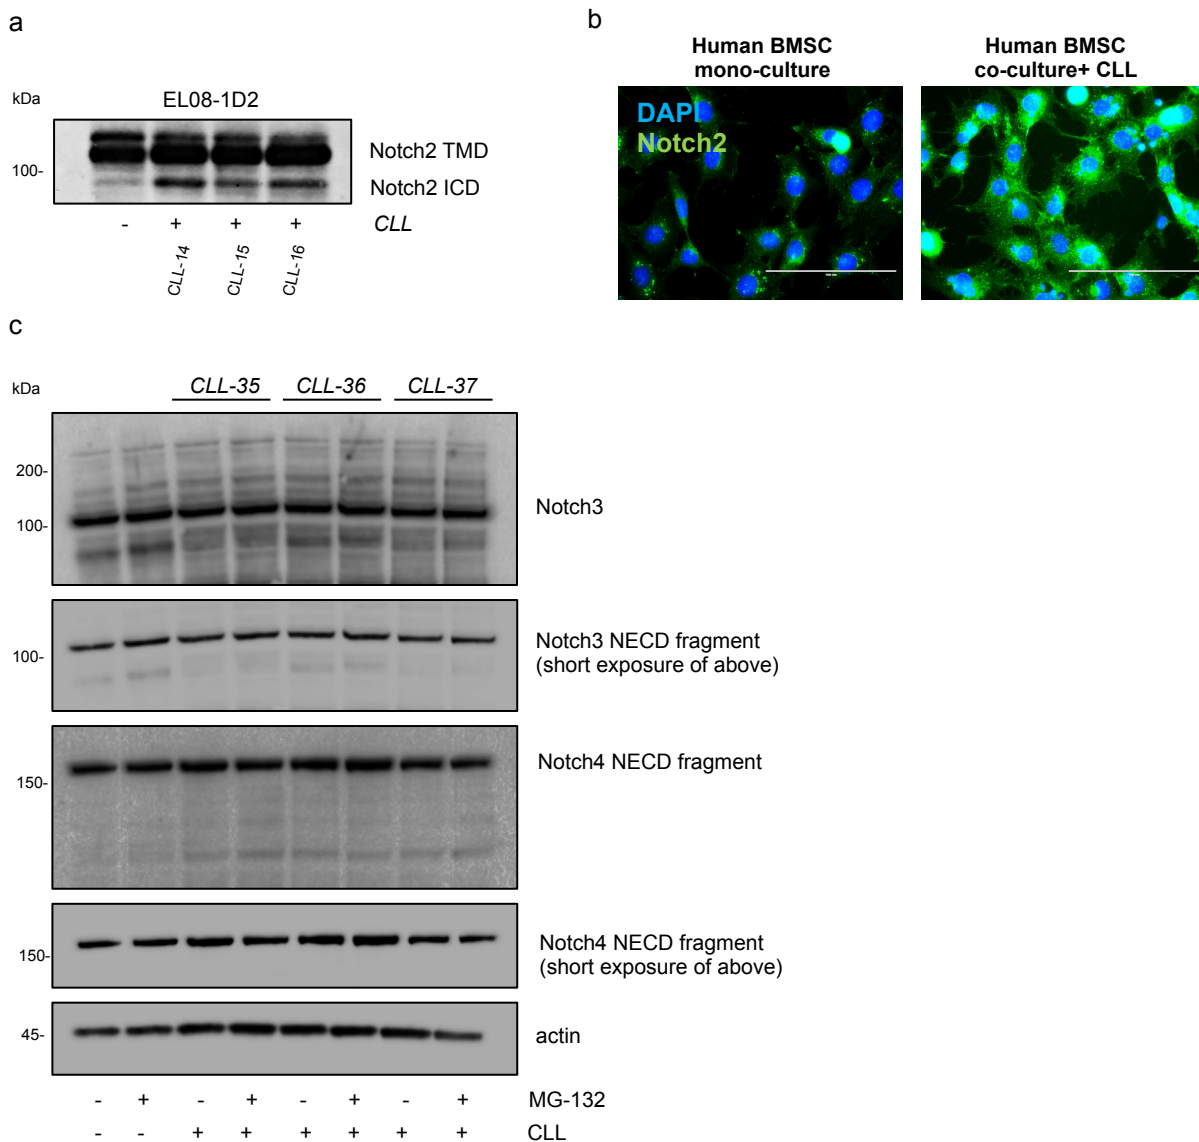

#### Supplementary Figure 4

- Transmembrane-domain (TMD) and cleaved (ICD) Notch2 levels were analysed in EL08-1D2 cells and EL08-1D2 cells co-cultured with CLL primary cells.
- Notch2 expression of human BMSC cells mono-cultured or co-cultured with primary CLL cells for 48 hours. One representative experiment out of three is shown. Scale bar = 100µm
- Notch3-4 were analysed in EL08-1D2 cells and EL08-1D2 co-cultured for 48 hours with CLL primary cells obtained from 3 different patients.

a

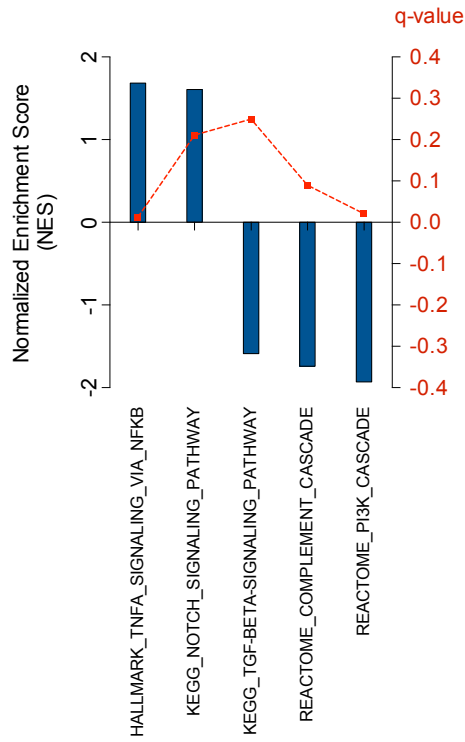

b

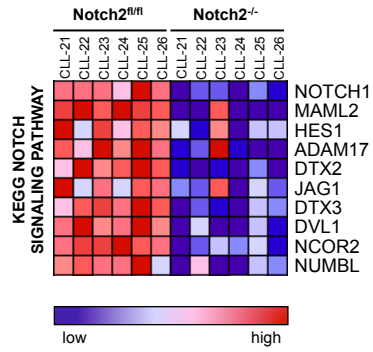

### Supplementary Figure 5

- GSEA comparing the expression of genes associated with the presence or absence of Notch2 in mono-cultured MSCs. Gene sets are listed in order of Normalised Enrichment Scores (left black Y-axis). FDR-q values for each gene set are indicated by the red-dotted line (right red Y-axis).
- Heat map displaying the GSEA 'core' genes involved in Notch signalling following Notch2 ablation in MSCs co-cultured with primary CLL cells corresponding to the gene-set depicted in figure 3d.

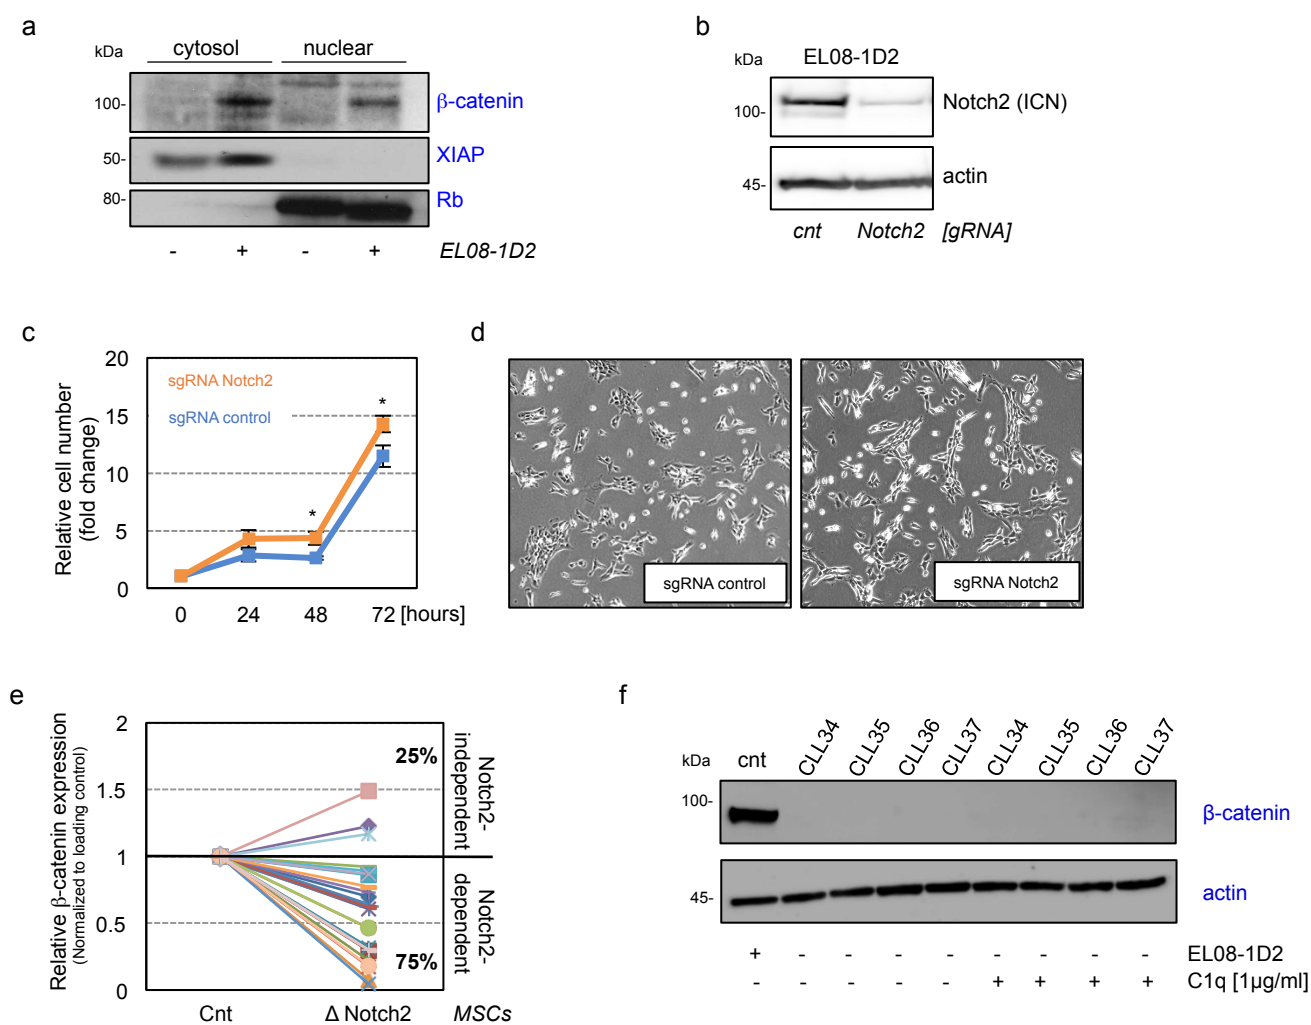

## Supplementary Figure 6

- Nuclear and cytoplasmic  $\beta$ -catenin levels were assessed in CLL cells derived from co-cultures with EL08-1D2 cells or from mono-cultures by cellular sub-fractioning and immunoblotting. Representative results from 3 different patients are shown. Nuclear expression was confirmed by co-expression of Rb.
- Notch2 expression following CRISPR/Cas9 mediated ablation in EL08-1D2, assessed by immunoblotting.
- EL08-1D2 cell proliferation was measured by cell count following CRISPR/Cas9 Notch2 deletion for 72h after cell plating. Results from 3 independent biological repeats are shown. Error bars depict SEM. \* $p < 0.05$ .
- Bright-field image of EL08-1D2 cells transduced with a sgRNA control or a Notch2 sgRNA 48h after plating.
- Quantification of  $\beta$ -catenin levels in CLL cells, cultured on Notch2 proficient or deficient (using either Cre-mediated or Cas9-mediated deletion of Notch2) stromal cells. Immunoblots were quantified by using Image-J software. Expression was normalised to the expression of housekeeping proteins. 20 individual patients were analysed.
- $\beta$ -catenin expression in CLL mono-cultures after 24 hours in media supplemented with C1q (N=4).

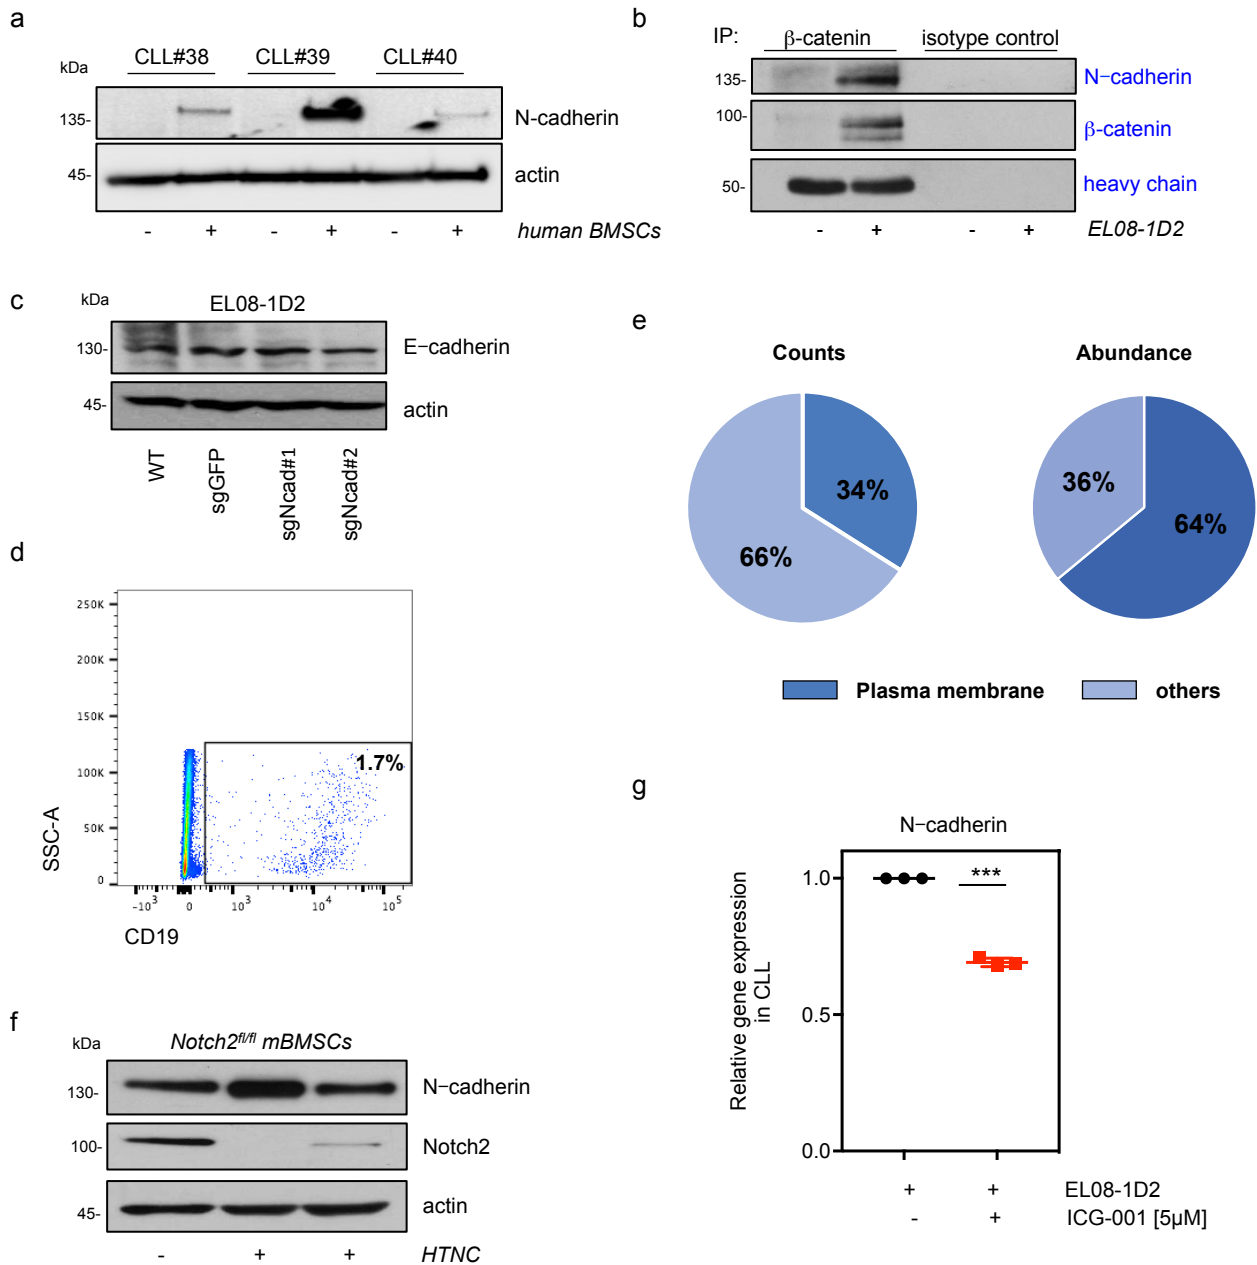

**Supplementary Figure 7**

- N-cadherin expression in 3 primary CLL cells mono-cultured or co-cultured with human BMSCs for 24 hours.
- β-catenin was immuno-precipitated from primary CLL lysates derived from mono-culture or from co-culture with EL08-1D2 cells and membranes probed with antibodies against N-cadherin. One representative experiment out of three is shown.
- E-cadherin expression was evaluated by immunoblotting in EL08-1D2 cells in which N-cadherin expression was ablated using CRISPR/Cas9. Two different guide RNAs were used.
- Flow cytometry analysis of CD19<sup>+</sup> cells contamination after aminoxy-biotin labelling of MSCs. The bulk of CLL cells were removed before labelling of MSCs.
- Pie chart representing the total protein count and the total protein abundance of plasma membrane proteins following mass spectrometry analysis.
- N-cadherin expression was evaluated by immunoblotting in Notch2<sup>fl/fl</sup> stromal cells following *in vitro* Cre-recombination. Two independent experiments are shown.
- Quantitative reverse-transcription polymerase chain reaction analysis of N-cadherin mRNA expression in primary CLL cells 24 hours after co-culture on EL08-1D2 (black circles) and in presence of 5μM ICG-001 (red squares) normalized to expression in control cells (0μM ICG-001). Shown is the mean ± standard deviation of 3 independent experiments with individual primary CLL cells. \*\*\*p < 0.001.



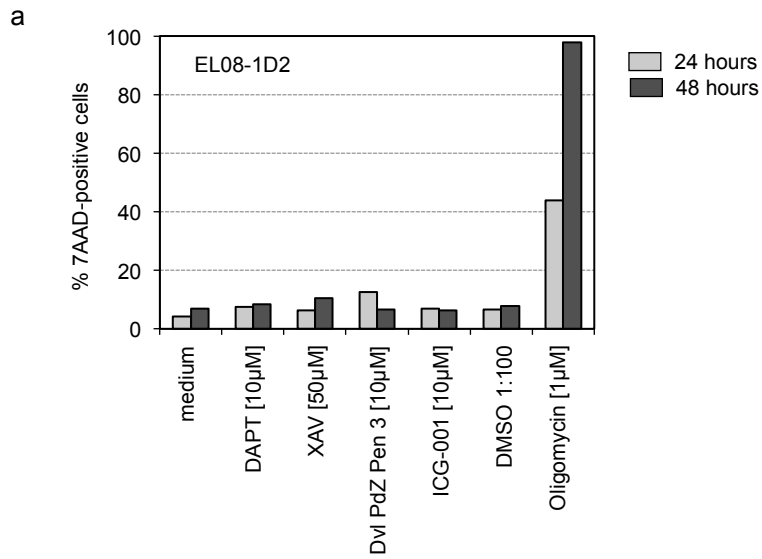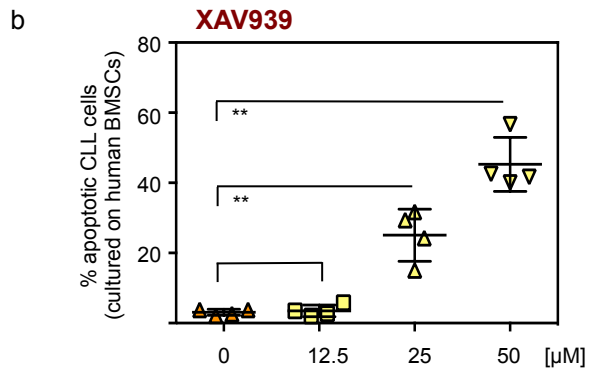

### Supplementary Figure 8

- Viability of EL08-1D2 cells, exposed for 48 hours to the inhibitors as indicated, was assessed by staining cells for 7AAD. Oligomycin treatment was used as positive control.
- Percentage of apoptotic CLL cells co-cultured on human BMSCs and increasing doses of XAV939 were detected by flow cytometry and staining for Annexin-V/DAPI. Error bars show mean  $\pm$  SEM from 4 patient samples.  $**p < 0.01$ .

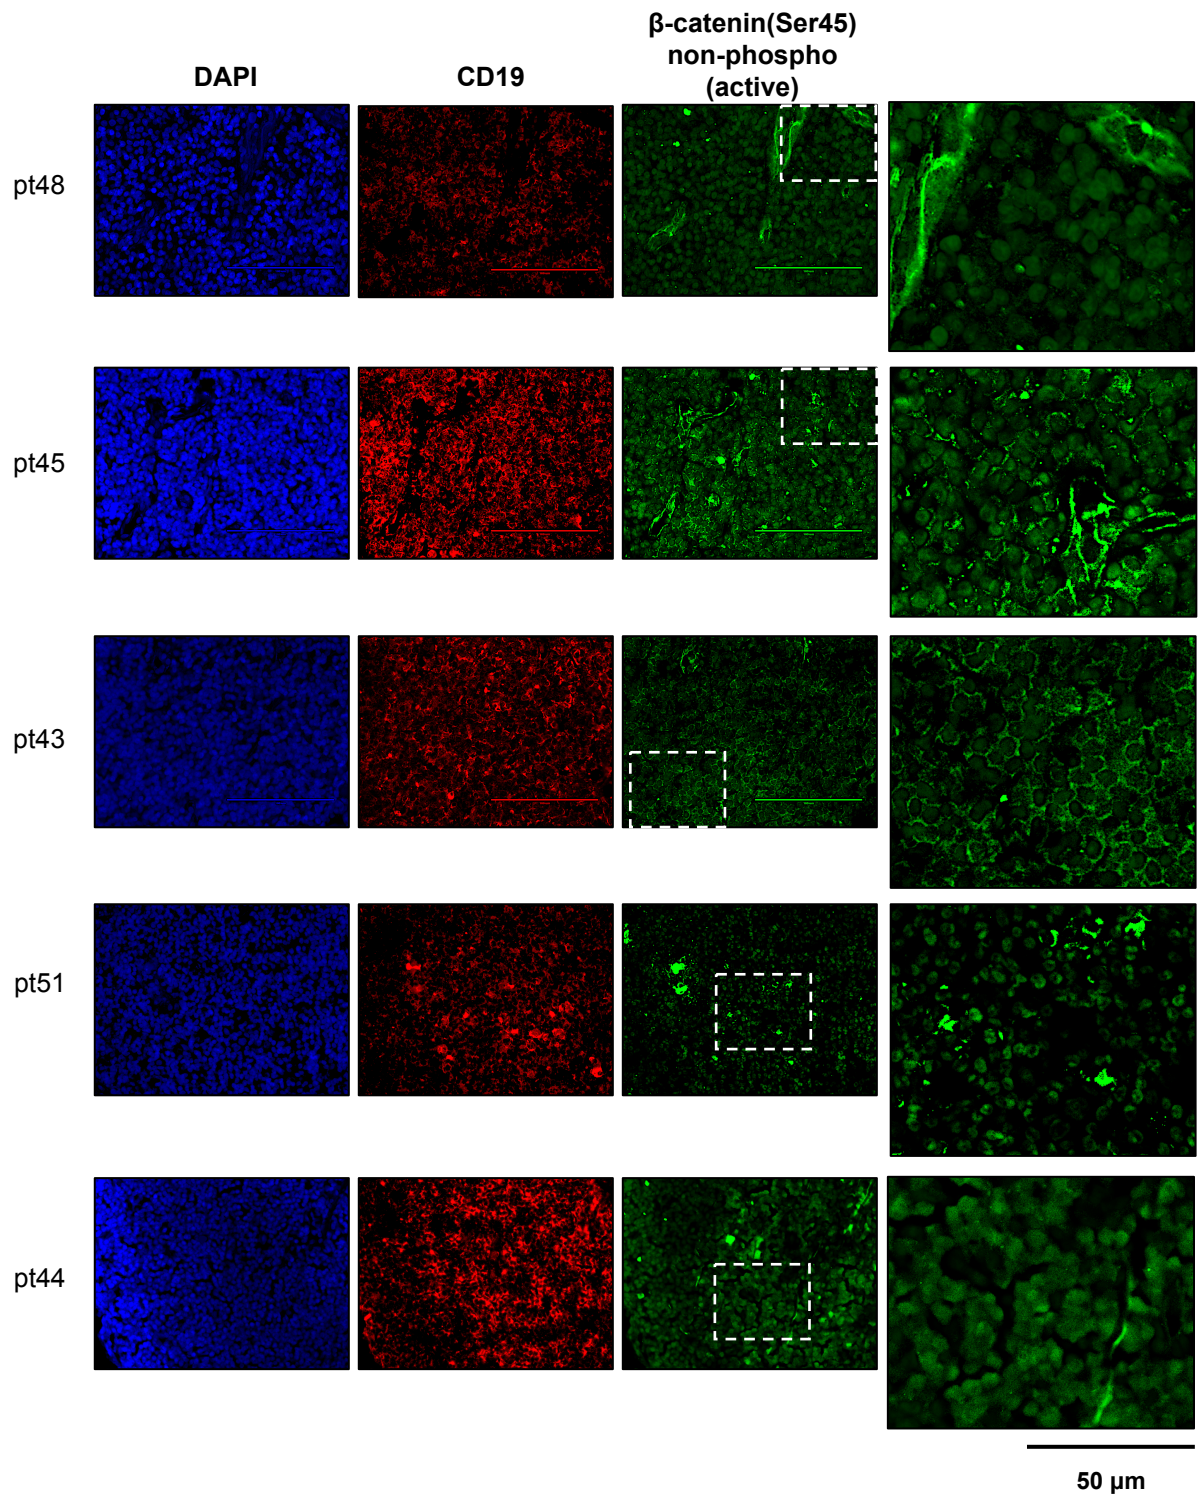

**Supplementary Figure 9**

$\beta$ -catenin was assessed in lymph node sections of CLL patients by immunofluorescence microscopy. An antibody was used to specifically detect the active form of  $\beta$ -catenin. Scale bar=100 $\mu$ m. The white dotted box in the 3<sup>rd</sup> panel shows the tissue section enlarged and depicted on the right.

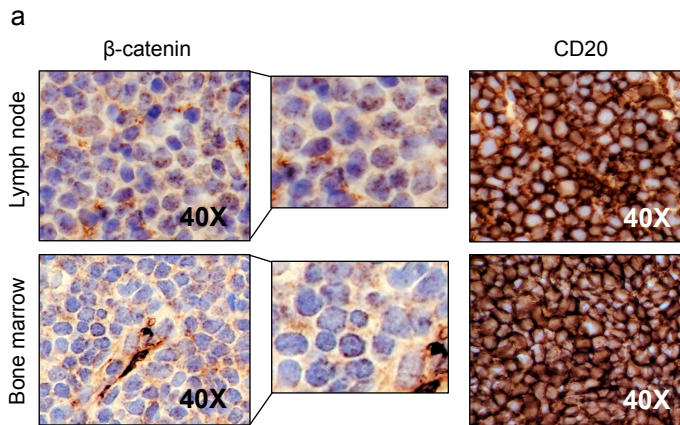

### Supplementary Figure 10

- a. Immunohistochemistry was performed on whole FFPE sections on both lymph node and bone marrow tissues from CLL patients. Six lymph nodes and 6 bone marrow trephine biopsies were examined with similar results

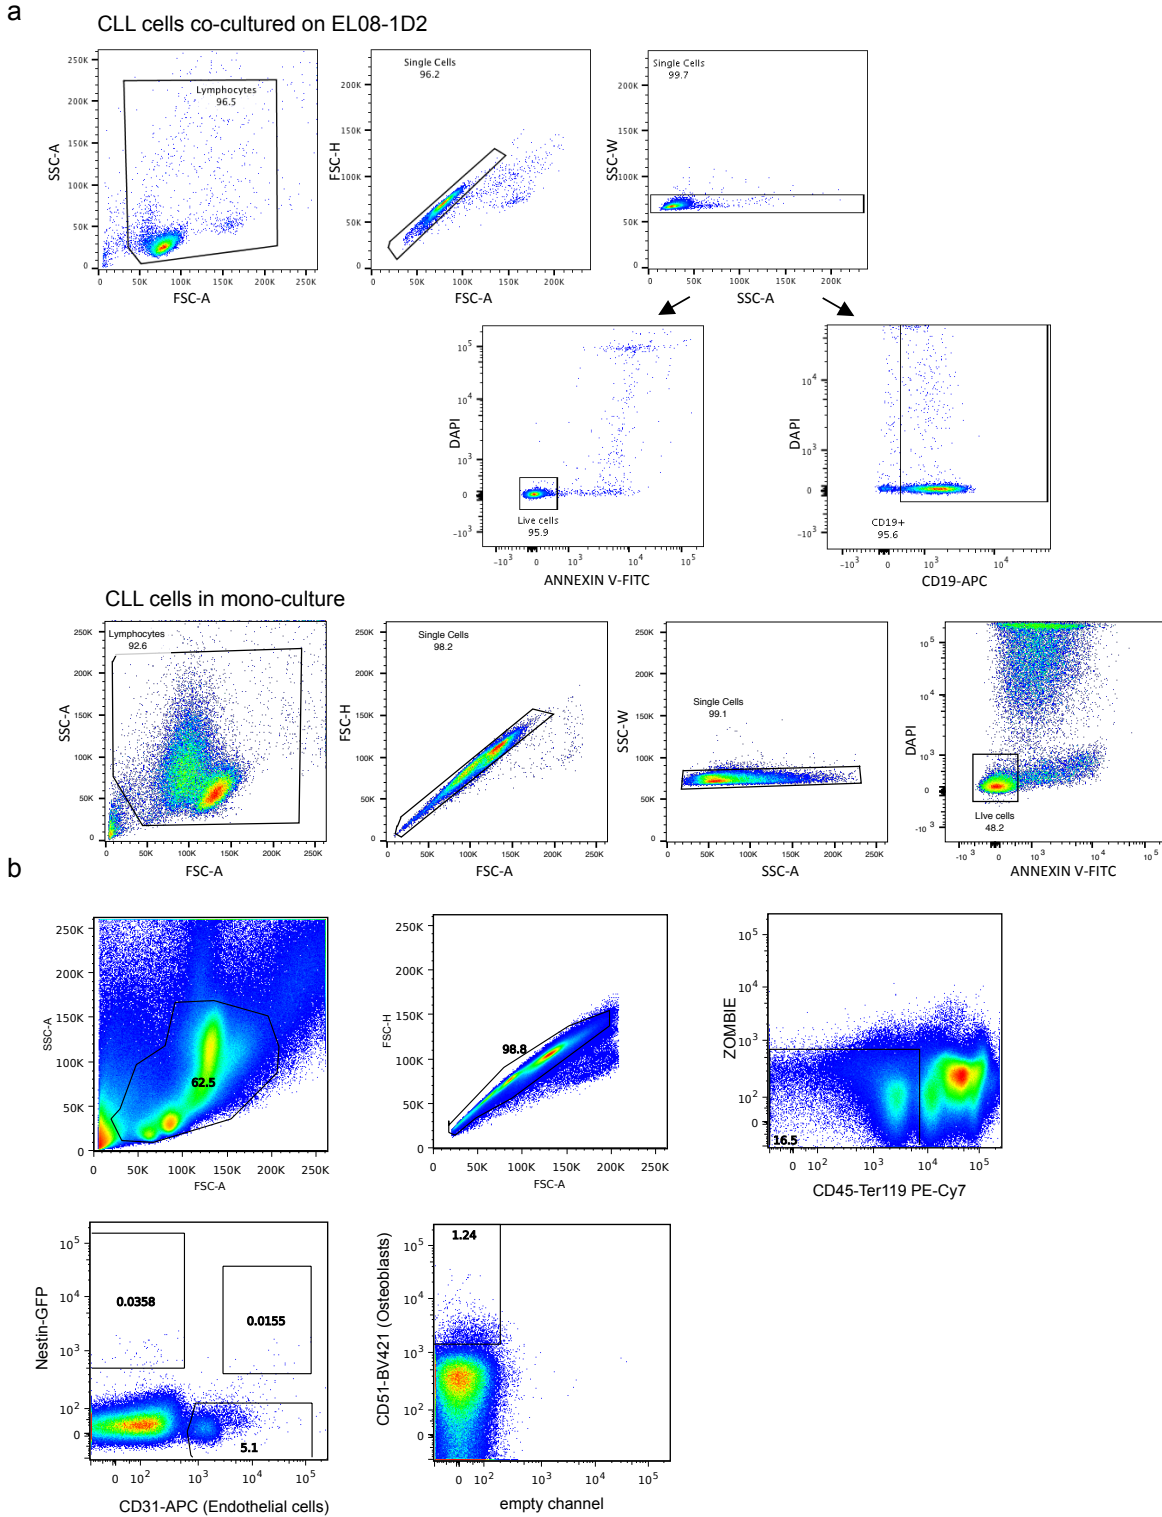

### Supplementary Figure 11

- Gating strategy for apoptotic CLL cells in mono-culture or in co-culture. SSC-A and FSC-A were used as the initial gate for cell debris and aggregates. In general, FSC-A/FSC-H followed by SSC-W/SSC-A was used to isolate singlets. DAPI was used to discriminate live from dead cells. Apoptotic cells were detected by staining for Annexin-V.
- Gating strategy for bone marrow derived MSC subpopulations. SSC-A and FSC-A were used as initial gate for cell debris and aggregates. In general, FSC-A/FSC-H followed by SSC-W/SSC-A was used to isolate singlets. DAPI was used to discriminate live from dead cells. Nestin-positive cells were gated on CD45-negative cells.

a

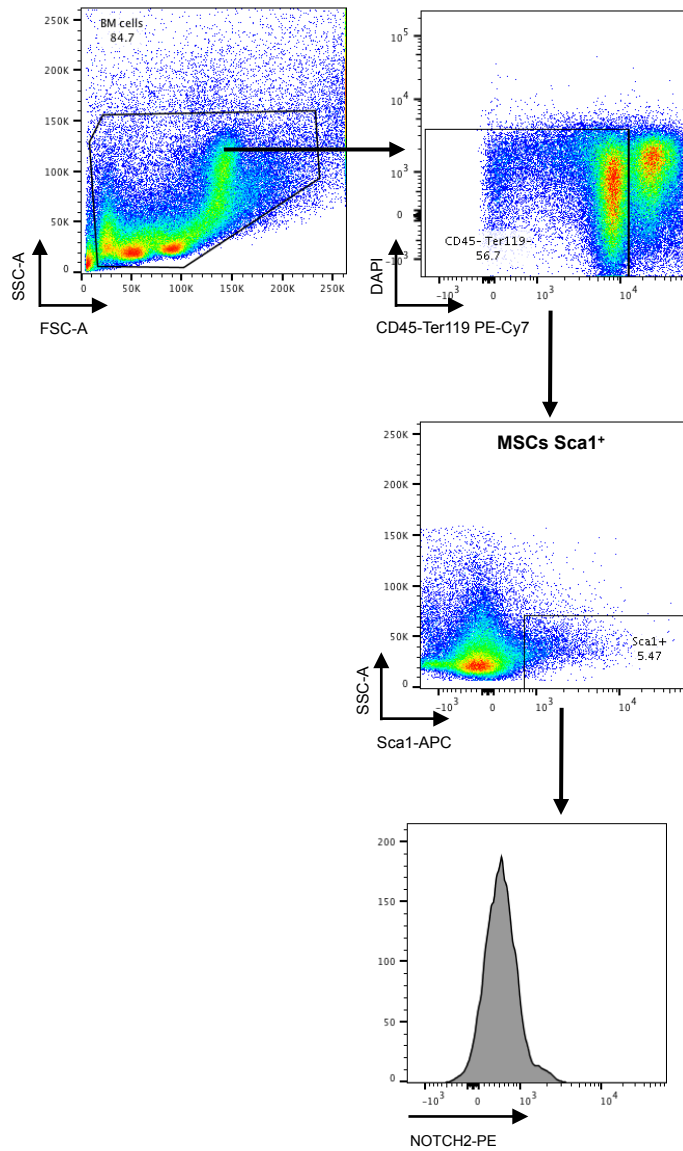

### Supplementary Figure 12

- a. Gating strategy used for the experiments depicted in figure 7b,c: A similar gating was applied as shown in supplement figure 11b with the exception that Sca-1 was used instead of Nestin/CD31.

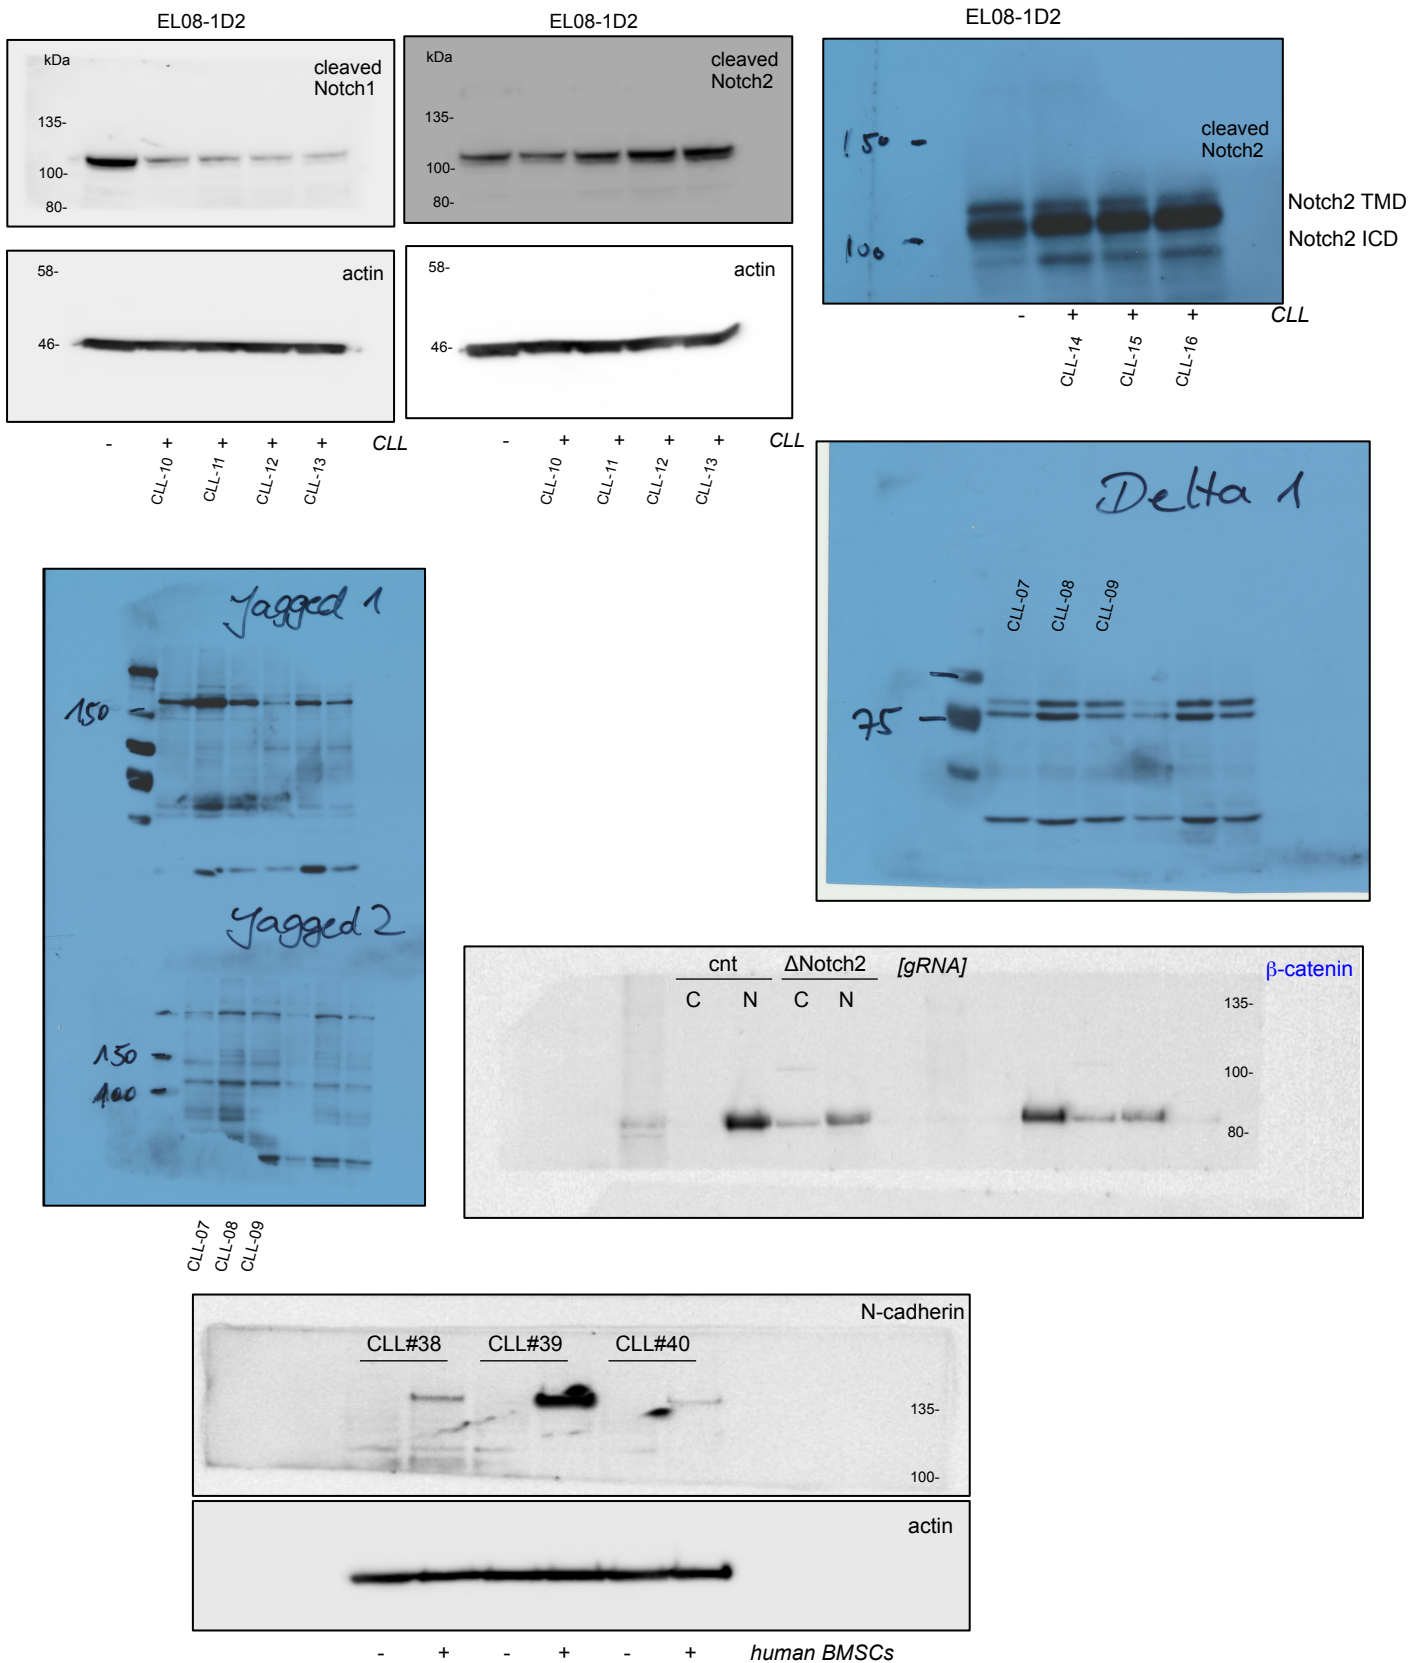

**Supplementary Figure 13**

Un-cropped western blots

| Sex | Binet Stage | IGHV status/ FISH/ cytogenetics | ZAP70 expression | CD38 expression | Number of previous therapies | $\beta$ -catenin dependency on stromal Notch2* |
|-----|-------------|---------------------------------|------------------|-----------------|------------------------------|------------------------------------------------|
| F   | A           | Not done                        | negative         | negative        | 0                            | 12%                                            |
| F   | A           | Not done                        | negative         | positive        | 0                            | 10%                                            |
| F   | A           | Not done                        | negative         | positive        | 0                            | 10%                                            |
| F   | A           | Del 13q                         | Not available    | negative        | 1                            | -88%                                           |
| F   | B           | Not done                        | n.a.             | n.a.            | 3                            | 55%                                            |
| M   | A           | Del 11q                         | n.a.             | n.a.            | 3                            | 0.2%                                           |
| F   | C           | Del 13q                         | n.a.             | negative        | 2                            | 18.6%                                          |
| F   | B           | Not done                        | n.a.             | negative        | 0                            | -3.7%                                          |
| F   | C           | Normal CLL FISH panel, p53 WT   | n.a.             | negative        | 1                            | 46%                                            |
| M   | A           | Not done                        | n.a.             | negative        | 0                            | 73%                                            |
| F   | C           | Del 13q, Del 11q                | n.a.             | n.a.            | 1                            | 88%                                            |
| M   | C           | Del 13q                         | n.a.             | negative        | 1                            | 77%                                            |
| F   | A           | Not done                        | n.a.             | n.a.            | 0                            | -48%                                           |
| F   | A           | Not done                        | n.a.             | n.a.            | 0                            | -59%                                           |
| M   | A           | Del 13q, Del 11q                | n.a.             | positive        | 1                            | -17%                                           |
| M   | C           | Del 13q                         | n.a.             | n.a.            | 1                            | 30%                                            |
| F   | A           | Not done                        | n.a.             | n.a.            | 0                            | 29%                                            |

ZAP70 and CD38 expression was determined by Flow Cytometry.

\*  $\beta$ -catenin expression in CLL cells cultured on Notch2-deficient MSCs/  $\beta$ -catenin expression in CLL cells cultured on Notch2-proficient MSCs expression was quantified by western blot and Image J software.

n.a.= data not available

## Supplementary Table 1

### Patient characteristics

| Gene Title                                                         | Gene symbol | Fold change (log <sub>2</sub> ) | p-value     |
|--------------------------------------------------------------------|-------------|---------------------------------|-------------|
| H-2 class II histocompatibility antigen, A-K alpha chain           | H2-Aa       | 6.64                            | 6.73113E-09 |
| Histocompatibility 2, T region locus 24                            | H2-T24      | 5.25                            | 3.177E-09   |
| L-selectin                                                         | Sell        | 4.76                            | 2.56346E-08 |
| C-X-C chemokine receptor type 5                                    | Cxcr5       | 4.74                            | 2.95899E-08 |
| H-2 class II histocompatibility antigen, E-D alpha chain           | H2-Ea       | 4.37                            | 2.09061E-08 |
| H-2 class II histocompatibility antigen, A-F beta chain (Fragment) | H2-Ab1      | 4.35                            | 1.40194E-08 |
| C-X-C chemokine receptor type 4                                    | Cxcr4       | 3.99                            | 2.32547E-08 |
| G-protein coupled receptor 183                                     | Gpr183      | 3.93                            | 3.32757E-07 |
| Eukaryotic translation initiation factor 3 subunit A               | Eif3a       | 3.85                            | 4.32215E-08 |
| H-2 class II histocompatibility antigen, I-A beta chain            | H2-Eb1      | 3.57                            | 3.62943E-08 |
| Receptor-type tyrosine-protein phosphatase C                       | Ptprc       | 3.12                            | 4.05805E-09 |
| Neural cell adhesion molecule L1                                   | L1cam       | 3.12                            | 2.99476E-09 |
| Ectonucleoside triphosphate diphosphohydrolase 1                   | Entpd1      | 2.92                            | 5.74167E-09 |
| Semaphorin-4D                                                      | Sema4d      | 2.64                            | 2.54844E-07 |
| Tyrosine-protein kinase Blk                                        | Blk         | 2.59                            | 7.69923E-08 |
| Tetraspanin-33                                                     | Tspan33     | 2.37                            | 8.23738E-06 |
| Integrin beta-2                                                    | Itgb2       | 2.33                            | 2.51935E-07 |
| Ras-related C3 botulinum toxin substrate 2                         | Rac2        | 2.33                            | 8.75252E-07 |
| Proto-oncogene tyrosine-protein kinase LCK                         | Lck         | 2.14                            | 4.82969E-06 |
| H-2 class I histocompatibility antigen, K-D alpha chain            |             | 1.65                            | 9.46389E-05 |
| Integrin alpha-X                                                   | Itgax       | 1.63                            | 0.000181204 |
| H-2 class I histocompatibility antigen, K-K alpha chain            | H2-K1       | 1.59                            | 0.000144712 |
| Semaphorin-4A                                                      | Sema4a      | 1.5                             | 2.73726E-05 |
| Cytochrome b-245 heavy chain                                       | Cybb        | 1.4                             | 4.85699E-05 |
| Lysophosphatidic acid receptor 5                                   | Lpar5       | 1.21                            | 9.64464E-05 |

## Supplementary Table 2

Plasma membrane proteins induced by CLL cells on EL08-1D2 cells



| Gene Title                                           | Gene symbol   | Fold change (log <sub>2</sub> ) | p-value     |
|------------------------------------------------------|---------------|---------------------------------|-------------|
| Neurogenic locus notch homolog protein 2             | Notch2        | 1.88                            | 2.019E-06   |
| Retrovirus-related Env polyprotein from Fv-4 locus   | Fv4           | 0.95                            | 0.000283718 |
| Neuronal cell adhesion molecule                      | Nrcam         | 0.91                            | 0.000937508 |
| C3a anaphylatoxin chemotactic receptor               | C3ar1         | 0.78                            | 0.000421834 |
| Uncharacterized protein FLJ45252 homolog             |               | 0.73                            | 0.020251392 |
| Complement decay-accelerating factor, GPI-anchored   | CD55          | 0.71                            | 0.001927835 |
| C-C chemokine receptor type 1                        | Ccr1          | 0.66                            | 0.005361613 |
| Sodium-dependent lysophosphatidylcholine symporter 1 | Mfsd2a        | 0.64                            | 0.02517761  |
| Clusterin                                            | Clu           | 0.63                            | 0.022191592 |
| Traf2 and NCK-interacting protein kinase             | Tnik          | 0.61                            | 0.022085732 |
| Glutamyl aminopeptidase                              | Enpep         | 0.6                             | 0.002542121 |
| Type-2 angiotensin II receptor                       | Agtr2         | 0.56                            | 0.02609523  |
| Hypermethylated in cancer 2 protein                  | Hic2          | 0.54                            | 0.005111496 |
| Killer cell lectin-like receptor 2                   | Klra2         | 0.53                            | 0.034991894 |
| Integrin beta-7                                      | Itgb7         | 0.52                            | 0.015223804 |
| B2 bradykinin receptor                               | Bdkrb2        | 0.5                             | 0.039249564 |
| Inhibin beta A chain                                 | Inhba         | 0.5                             | 0.035432381 |
| Calpain-6                                            | Capn6         | -0.41                           | 0.036208618 |
| Metalloprotease TIK12                                | Trabd2b       | -0.43                           | 0.035024551 |
| Collagen alpha-2(VI) chain                           | Col6a2        | -0.44                           | 0.043214805 |
| Putative uncharacterized protein                     | 2210010C04Rik | -0.45                           | 0.04051605  |
| Receptor-type tyrosine-protein phosphatase V         | Ptprv         | -0.49                           | 0.028981233 |
| Perilipin-4                                          | Plin4         | -0.5                            | 0.027007517 |
| Chondroitin sulfate proteoglycan 4                   | Cspg4         | -0.52                           | 0.004628809 |
| Plexin domain-containing protein 1                   | Plxdc1        | -0.53                           | 0.013488852 |
| Neurogenic locus notch homolog protein 1             | Notch1        | -0.54                           | 0.039027808 |
| Integrin alpha-11                                    | Itga11        | -0.57                           | 0.010800793 |
| PTB domain-containing engulfment adapter protein 1   | Gulp1         | -0.58                           | 0.016305891 |
| Leucine-rich repeat-containing protein 15            | Lrrc15        | -0.68                           | 0.000826755 |

### Supplementary Table 3

Plasma membrane proteins regulated by stromal Notch2 in CLL -EL08-1D2 co-cultures

| Target                                                       | Clone Cat. N.       | manufacturer                               | Dilution                                      | Figure                                                                         |
|--------------------------------------------------------------|---------------------|--------------------------------------------|-----------------------------------------------|--------------------------------------------------------------------------------|
| Delta                                                        | C-20<br>sc-377310   | Santa Cruz<br>Biotechnology                | 1:1000                                        | S1a                                                                            |
| Jagged-1                                                     | H-114<br>sc-8303    | Santa Cruz<br>Biotechnology                | 1:1000                                        | S1a                                                                            |
| Jagged-2                                                     | H-143<br>sc-5604    | Santa Cruz<br>Biotechnology                | 1:1000                                        | S1a                                                                            |
| N-Cadherin                                                   | H-63<br>sc-7939     | Santa Cruz<br>Biotechnology                | 1:1000                                        | 5a, 5b, 5d, 5i, 6c, S5a, S5b,<br>S5f                                           |
| HES-1                                                        | H-140<br>sc-25392   | Santa Cruz<br>Biotechnology                | 1:1000                                        | 6c                                                                             |
| XIAP                                                         | 2042                | Cell Signaling<br>Technology               | 1:5000                                        | 4f, S4a                                                                        |
| β-Catenin                                                    | D10A8<br>#8480      | Cell Signaling<br>Technology               | 1:500                                         | 4a, 4b, 4c, 4d, 4e, 4f, 4g 4h,<br>4i, 4j, 5a, 5b, 5e, 6e, 8b,<br>S4a, S4f, S5b |
| Non-phospho<br>(Active) β-<br>Catenin (Ser45)                | D2U8Y<br>#19807     | Cell Signaling<br>Technology               | 1:1000 (WB)<br>1:100 (IF CLL)<br>1:50 (IF LN) | 4d, 8a                                                                         |
| Non-phospho<br>(Active) β-<br>Catenin<br>(Ser33/37,Th41<br>) | D13A1<br>#8814      | Cell Signaling<br>Technology               | 1:1000<br>1:100                               | 4d                                                                             |
| β-Actin                                                      | 13E5<br>#4970       | Cell Signaling<br>Technology               | 1:10000                                       | 2,4,5,6,8,S2,S4,S5                                                             |
| NOTCH1                                                       | D1E11<br>#3608      | Cell Signaling<br>Technology               | 1:1000                                        | 2c                                                                             |
| NOTCH2                                                       | D76A6<br>#5732      | Cell Signaling<br>Technology               | 1:1000<br>1:100                               | 2d, 2e, 2f, 2g, 3b, 5d, S2e,<br>S4b, S5f                                       |
| GSK-3β                                                       | 27C10<br>#9315      | Cell Signaling<br>Technology               | 1:2000                                        | 4g, 4h, 4j                                                                     |
| p-GSK-3β Ser9                                                | D85E12<br>#5558     | Cell Signaling<br>Technology               | 1:1000                                        | 4g, 4h, 4j                                                                     |
| CD19                                                         | 2E2B6B10<br>ab31947 | Abcam                                      | 1:100                                         | 8a                                                                             |
| NOTCH3                                                       | ab23426             | Abcam                                      | 1:1000                                        | S2f                                                                            |
| NOTCH4                                                       | ab184742            | Abcam                                      | 1:1000                                        | S2f                                                                            |
| Rb                                                           | G3-245<br>554136    | BD Pharmigen                               | 1:1000                                        | S4a                                                                            |
| NOTCH2 ICD                                                   | C651.6DbH<br>N      | Developmental<br>studies<br>Hybridoma Bank | 1:1000                                        | S2d                                                                            |
| CAS9                                                         | 7A9<br>MAC133       | Merck Millipore                            | 1:2000                                        | 5d                                                                             |

**Supplementary Table 4**  
Antibodies used for immunoblotting

| name               | species      | sequence 5`-3`        |
|--------------------|--------------|-----------------------|
| β-catenin forward  | Homo sapiens | CCCACTGGCCTCTGATAAAGG |
| β-catenin reverse  | Homo sapiens | ACGCAAAGGTGCATGATTTG  |
| Gapdh forward      | Homo sapiens | CCTGTTCGACAGTCAGCCG   |
| Gapdh reverse      | Homo sapiens | CGACCAAATCCGTTGACTCC  |
| N-cadherin forward | Homo sapiens | AGGGTGGACGTCATTGTAGC  |
| N-cadherin reverse | Homo sapiens | CTGTTGGGGTCTGTCAGGAT  |
| C1qa forward       | Mus musculus | CGGGTCTCAAAGGAGAGAGA  |
| C1qa reverse       | Mus musculus | TATTGCCTGGATTGCCTTTC  |
| C1qb forward       | Mus musculus | CAGGGATAAAGGGGGAGAAA  |
| C1qb reverse       | Mus musculus | TCTGTGTAGCCCCGTAGTCC  |
| C1qc forward       | Mus musculus | CTTCTGGCCCTACCACTCAG  |
| C1qc reverse       | Mus musculus | CTTCTGACCCTTGGGTCCTC  |

**Supplementary Table 5**  
Primer sequence for qPCR analysis

| Target   | clone    | Dilution | manufacturer   | Figure               |
|----------|----------|----------|----------------|----------------------|
| Notch1   | HMN1-12  | 1:100    | Biolegend      | 2b, S3b, S3c         |
| Notch3   | HMN3-133 | 1:100    | Biolegend      | 2b, S3b              |
| Notch4   | HMN4-14  | 1:100    | Biolegend      | 2b, S3b              |
| Notch2   | 16F11    | 1:100    | eBioscience    | 2b, 3b, 7b, S3b, S3c |
| CD45     | 30F11    | 1:200    | eBioscience    | 7b, S3c              |
| TER119   |          | 1:400    | BD Biosciences | 7b, S3c              |
| CD31     | MEC13.2  | 1:100    | BD Biosciences | S3c                  |
| CD51     | RMV-7    | 1:100    | BD Biosciences | S3c                  |
| DLL1     | MHD1-314 | 1:50     | Biolegend      | 2a                   |
| Jagged-1 | MHJ1-152 | 1:50     | BD Biosciences | 2a                   |
| Jagged-2 | MHJ2-523 | 1:50     | BD Biosciences | 2a                   |

**Supplementary Table 6**  
Antibodies used for FACS analyses

| name               | species      | sequence 5`-3`       |
|--------------------|--------------|----------------------|
| SgRNA Notch2       | Mus musculus | CGCCCGTACTCACCGTGCG  |
| SgRNA N-cadherin_1 | Mus musculus | TGAAGCAAGGCCGCCAGAAG |
| SgRNA N-cadherin_2 | Mus musculus | TTACAGCGCAGTCTTACCGA |

**Supplementary Table 7**  
sgRNA sequences
